# Supplementary material for: Detection of aberrant methylation of a six-gene panel in serum DNA for diagnosis of breast cancer
Source: PubMed Central journal article supplement (PMC4951303; doi:10.18632/oncotarget.7608), 2016-02-23
Supplement: oncotarget-07-18485-s001.pdf [file oncotarget-07-18485-s001.pdf]

## SUPPLEMENTARY TABLES

Supplementary Table S1: The summary of all the target genes

| Gene    | Gene ID | Full Name                                                | Summary                                                                                                                                                                                                                                                                                                                                                  |
|---------|---------|----------------------------------------------------------|----------------------------------------------------------------------------------------------------------------------------------------------------------------------------------------------------------------------------------------------------------------------------------------------------------------------------------------------------------|
| SFN     | 2810    | stratifin                                                | Diseases associated with SFN include limbal stem cell deficiency and bladder squamous cell carcinoma. Among its related pathways are Regulation of Wnt-mediated beta catenin signaling, P53 signaling pathway and Glucocorticoid receptor regulatory network.                                                                                            |
| P16     | 1029    | also named CDKN2A (Cyclin-Dependent Kinase Inhibitor 2A) | P16 is a Protein Coding gene. Diseases associated with P16 include melanoma, cutaneous malignant and neural system tumor syndrome. Among its related pathways are Glioma and Pathways in cancer. GO annotations related to this gene include <i>protein kinase binding</i> and <i>p53 binding</i> .                                                      |
| hMLH1   | 4292    | human MutL Homolog 1                                     | hMLH1 is a Protein Coding gene. Diseases associated with hMLH1 include colorectal cancer, hereditary nonpolyposis and lynch syndrome. Among its related pathways are Pathways in cancer and Cell Cycle / Checkpoint Control. GO annotations related to this gene include <i>ATPase activity</i> and <i>MutSalpha complex binding</i> .                   |
| HOXD13  | 3239    | Homeobox D13                                             | HOXD13 is a Protein Coding gene. Diseases associated with HOXD13 include brachydactyly and syndactyly. GO annotations related to this gene include <i>sequence-specific DNA binding transcription factor activity</i> and <i>chromatin binding</i> .                                                                                                     |
| PCDHGB7 | 56099   | Protocadherin Gamma Subfamily B, 7                       | PCDHGB7 is a Protein Coding gene. It is a member of Cluster Protocadherins. GO annotations related to this gene include <i>calcium ion binding</i> and <i>neural system disorder</i> .                                                                                                                                                                   |
| RASSF1a | 11186   | Ras Association (RalGDS/AF-6) Domain Family Member 1     | RASSF1 is a Protein Coding gene. Diseases associated with RASSF1 include intracranial primitive neuroectodermal tumor and monophasic synovial sarcoma. Among its related pathways are Ras signaling pathway and Pathways in cancer. GO annotations related to this gene include <i>identical protein binding</i> and <i>protein N-terminus binding</i> . |

Supplementary Table S2: Nucleotide sequences for methylight primers and probes of all the candidate genes and methylight reaction temperature

| <i>Gene</i>    | <i>Forward-Primer</i>           | <i>Reverse-Primer</i>        | <i>Production Size</i> | <i>Probe</i>                            | <i>Methylation Condition</i>   |           |
|----------------|---------------------------------|------------------------------|------------------------|-----------------------------------------|--------------------------------|-----------|
| <b>SFN</b>     | TATGAAAGGCG<br>TCGTGGAGA        | GATACTCACGC<br>ACCTCGAACC    | 179                    | <b>AACGTGGTGGGCGGT</b>                  | 95°C, 3 min                    | 1 cycle   |
|                |                                 |                              |                        |                                         | 95°C, 10 secs<br>60°C, 30 secs | 40 cycles |
| <b>Globin</b>  | AGGTAGAAAAGGA<br>GAATGAAGATAAA  | CTTCCACTCTTT<br>TCTCATTCTCTC | 143                    | <b>AGGAGGATAAGGAA<br/>GAGGGGAAATAGG</b> | 95°C, 3 min                    | 1 cycle   |
|                |                                 |                              |                        |                                         | 95°C, 10 secs<br>60°C, 30 secs | 40 cycles |
| <b>hMLH1</b>   | TGAGGYGGYG<br>ATAGATTAGG        | TCCCCTTACRAC<br>CTTCTAACR    | 187                    | <b>AACGTTGGG TTTATT<br/>CGG</b>         | 95°C, 3 min                    | 1 cycle   |
|                |                                 |                              |                        |                                         | 95°C, 10 secs<br>60°C, 30 secs | 40 cycles |
| <b>HOXD13</b>  | AGGYGGGAGGT<br>TTATAGAGGG       | AACTCCCRAC<br>RCRACTCATA     | 145                    | <b>AGGCGCGTCGCGTT</b>                   | 95°C, 3 min                    | 1 cycle   |
|                |                                 |                              |                        |                                         | 95°C, 10 secs<br>60°C, 30 secs | 40 cycles |
| <b>RASSF1a</b> | TGAAGGTTRGAGATT<br>TTTTGTTTTATT | GCAAAACACC<br>AyGyGAAAATA    | 158                    | <b>AGTAAATCGGA TTAGG<br/>AGGG</b>       | 95°C, 3 min                    | 1 cycle   |
|                |                                 |                              |                        |                                         | 95°C, 10 secs<br>60°C, 30 secs | 40 cycles |
| <b>PCDHGB7</b> | CGTTATTCGATT<br>TCGAGGAG        | TTCACAAATAA<br>ATCCCCGCTCT   | 161                    | <b>TGGTTAAGGG TTCG<br/>GTGGT</b>        | 95°C, 3 min                    | 1 cycle   |
|                |                                 |                              |                        |                                         | 95°C, 10 secs<br>60°C, 30 secs | 40 cycles |
| <b>P16</b>     | GGGGTRGGGT<br>AGAGGAGGT         | AATCGACCTCC<br>GACCGTAACT    | 83                     | <b>TGTTGTTGG AGGC<br/>GGG</b>           | 95°C, 3 min                    | 1 cycle   |
|                |                                 |                              |                        |                                         | 95°C, 10 secs<br>60°C, 30 secs | 40 cycles |
